# Supplementary material for: Resistance Is Not Futile: Widespread Convergent Evolution of Resistance to Alpha-Neurotoxic Snake Venoms in Caecilians (Amphibia: Gymnophiona)
Source: MDPI journal article supplement (doi:10.3390/ijms241411353), 2023-07-12
Supplement: s1 [file s1]

Chrna1 - orthosteric region (alpha-1 positions 187-200)

>NC\_044037.1:223677047-223677226 *Microcaecilia unicolor* chromosome 7, a*Microcaecilia unicolor*1.1, whole genome shotgun sequence

CGCGTAGACTACTCCTGCTGTCCGGAACTCCGTATCTGGAT

>NC\_042620.1:115850301-115850480 *Rhinatrema bivittatum* chromosome 6, a*Rhinatrema bivittatum*1.1, whole genome shotgun sequence

CGGGTGAAGTACTCCTGCTGTGGAGATACTCCATACCTGGAT

>*Caudacaecilia asplenia*\_ZRC1.10835

GACATATACTATTCCTGCTGTCCGGATACTCCCTATCTGGAT

>*Ichthyophis glutinosus*\_WHT5508

TACGTAACTATAGCTGCTGTCCGGAACTCCCTACCTGGAT

>*Ichthyophis kohtaoensis*

AACATATCCTATGCCTGCTGTCTGGAGACTCCCTATCTGGAT

>*Ichthyophis garoensis*\_BNHS2208

AACATATCCTATGCCTGCTGTCCGGAACTCCCTATCTGGAT

>*Ichthyophis sendenyu*\_BNHS2209

AACATATCCTATGCCTGCTGTCTGGAACTCCCTATCTGGAT

>*Ichthyophis orthoplicatus*\_DNMMW1723

TACGTAACTATAGCTGCTGTCCGGAACTCCCTACCTGGAT

>*Uraeotyphlus* cf. *malabaricus*\_UKMW1711

TACGTAACTATGCCTGCTGTCCAGAACTCCCTATCTGGAT

>*Uraeotyphlus* cf. *oxyurus*\_UK MW212

TACGTAACTATGCCTGCTGTCTGGAACTCCCTATCTGGAT

>*Scolecophorus uluguruensis*\_BMNH2002.099

TATGTATACTACGCCTGCTGTCCAGAACTCCATATCTGGAT

>*Scolecophorus vittatus* CAS168810

TACGTATACTACGCCTGCTGTCCAGAACTCCGTATCTGGAT

>*Herpele squalostoma*\_BMNH2000.096

TACGTGTACTATGCCTGCTGTCCGAACACGCCGTACCTGGAC

>*Boulengerula boulengeri*\_RAN31530

TACGTGTACTACGCCTGCTGTCTAGAACTCCATACCTGGAC

>*Chthonerpeton indistinctum*\_MCPMW15

TACGTGCACTACGCCTGCTGTCCAGAACTCCTTATCTGGAC

>*Typhlonectes compressicauda*\_UMFS11776

TATGTGACTTACTCCTGCTGTCCAGATACTCCTTATCTGGAT

>*Typhlonectes natans*\_BMNH2000.218.

TATGTGAAGTACTCCTGCTGTCCAGATACTCCTTATCTGGAT

>*Potomotyphlus kaupii*\_UMFS11777

TATGTGACTTACTCCTGCTGTCCAGATACTCCTTATCTGGAT

>*Caecilia abitaquae*\_MZUTI4030

TACGTGACCTACGCCTGCTGTCTAGAACTCCTTATCTGGAT

>*Caecilia guntheri*\_MZUTI3039

AACGTGACCTACGCCTGCTGTCTAGAACTCCTTATCTGGAT

>*Caecilia orientalis*\_MZUTI1371

TACGTGACCTACGCCTGCTGTCCAGAACTCCTTATCTGGAT

>*Caecilia tentaculata*\_MZUTI3919

AACGTGACCTACTCCTGCTGTGGAGAACTCCTTATCTGGAT

>Gegeneophis ramaswamii\_UKMW331  
 TACATAAACTACAGCTGCTGTCCAGACGTTCCGTATCTGGAT  
 >Hypogeophis rostratus\_RAN31441  
 TACGTAACCTACGCCTGCTGTCCAGACCTTCCATATCTGGAT  
 >Praslinia cooperi\_RAN31305  
 TACGTAACCTACGCCTGTTGTCCAGACCTTCCATATCTGGAT  
 >Hypogeophis alternans\_RAN 31465  
 TACGTAACCTACGCCTGCTGTCCAGACCTTCCATATCTGGAT  
 >Luetkenotyphlus brasiliensis\_BMNH2005.3  
 TATGTAACCTACGCCTGCTGTCCGGACACTCCGTATCTGGAT  
 >Microcaecilia sp,\_NHMMW995  
 TATGTAACCTACGCTTGCTGTCCGAACACTCCGTATCTGGAT  
 >Siphonops annulatus\_RAN31968  
 TGTGTAACCTACTCCTGCTGTCTGGACACTCCGTATCTGGAT  
 >Siphonops paulensis\_CHUNB39114  
 TGTGTAACCTACGCCTGCTGTCAGGACACTCCGTATCTGGAT  
 >Schistometopum thomense\_RAN31503  
 AACGTAACCTACGGCTGCTGTCCAGACACTCCCTATTTGGAT  
 >Geotrypetes\_seraphini\_XM\_033939894.1  
 TACGTCACCTATGCCTGTTGTCCGGACACTCCATATCTGGAT  
 >Dermophis mexicanus\_RAN31534  
 TTCGTATGCTACTCCTGCTGTCCAGACACTCCATATCTGGAT  
 >Gymnopsis syntrema\_RAN31499  
 TACRTASMSTACGGCTGCTGTGCAGACACTCTGTATCTGGAT  
 >Chikila gaiduwani\_BNHS2211  
 AACGTGACGTACTTCTGCTGTGGGGACACTCCGTATCTGGAC  
 >Chikila alcocki\_BNHS2210  
 AACGTGACGTACGCCTGCTGTGGGGACACTCCGTATCTGGAC  
 >Hypogeophis pti\_SM295  
 NNNNNNNCCTACGCCTGCTGTCCAGACCTTCCATATCTGGAT  
 >Hypogeophis larvatus\_SM297  
 NNNNNNACATACGCCTGCTGTCCAGACCTTCCATATCTGGAT  
 >Hypogeophis brevis\_SM691  
 NNNNNNNCCTACGCCTGCTGTCCAGACCTTCCATATCTGGAT  
 >CM030321.1:437425379-437425558 Ambystoma mexicanum strain DD151 chromosome  
 9q, whole genome shotgun sequence  
 TGGGTTTATTATACCTGCTGTCCGGATACACCATACTTGGAC  
 >M0365642\_Pleurodeles waltl\_PLEWA04\_M0365642\_PLEWA02\_M0365642\_PLEWA02  
 TRINITY\_DN300233\_c9\_g1::TRINITY\_DN300233\_c9\_g1\_i1::g.365642::m.365642  
 TRINITY\_DN300233\_c9\_g1::TRINITY\_DN300233\_c9\_g1\_i1::g.365642 ORF type:5prime\_partial  
 len:487 (+) TRINITY\_DN300233\_c9\_g1\_i1:1-1461(+) parent\_contig=Trinity\_Pw\_v2  
 TGGGTGTATTATGCATGTTGTCAGGAAACACCATACTTGGAC  
 >CAJPDP013104969.1:36-215 Bombina variegata variegata genome assembly, contig:  
 contig\_3104969, whole genome shotgun sequence  
 TGGGTTTATTACGCCTGCTGTCCTGACACCCCATATCTGGAT  
 >LR991673.1:183921276-183921455 Bufo bufo genome assembly, chromosome: 7  
 TGGGTCACATACACATGCTGTCCTGATGTACCATACTTGGAT

>CM026472.1:34540173-34540352 *Bufo gargarizans* isolate SCDJY-AF-19 chromosome 8, whole genome shotgun sequence  
TGGGTCACATACACATGCTGTCTTAACGTACCATACTTGGAT

>CM033648.1:76491222-76491401 *Engystomops pustulosus* isolate 237g6f4 chromosome 8, whole genome shotgun sequence  
TATGTTTTCTATGACTGCTGCCCTGATAAACCATATCTGGAT

>ONZH01026881.1:670711-670890 *Rhinella marina* genome assembly, contig: ctg3915\_RHIMB\_RM170330.3915, whole genome shotgun sequence  
GGGGTCGAATACACATGCTGTCCTGACGTCCCATACTTGGAT

>VIAB01000030.1:258890-259069 *Oophaga pumilio* Sca30, whole genome shotgun sequence  
TGGGTCACATATGCCTGCTGCCCCGATGTCCCATACTTGGAT

>CM034095.1:51234791-51234970 *Eleutherodactylus coqui* isolate HN-11 Male chromosome 10, whole genome shotgun sequence  
TGGGTCACATATGCGTGCTGTCCGGATGTCCCATACTTGGAT

>KN905892.1:795302-795481 *Nanorana parkeri* isolate BGI\_ZX\_2015 unplaced genomic scaffold scaffold44, whole genome shotgun sequence  
TGGGTTTTCTATACCTGCTGTCCTGACGTTCCATACCTGGAC

>JAE0BE010700063.1:713-892 *Phrynoglossus myanhessei* voucher SMF 103841 isolate Holotype NODE\_4282317\_length\_3454\_cov\_14.630863, whole genome shotgun sequence  
TGGGTTTACTATGGTTGCTGTCCTGATGTCCCATACCTGGAC

>WWET01001398.1:49535-49714 *Limnodynastes dumerilii* isolate SAMAR66870 scaffold001398, whole genome shotgun sequence  
TGGGTCACATACACATGCTGCCCTGATGTCCCCTACTTAGAT

>JABWIB010022546.1:4978-5157 *Platyplectrum ornatum* isolate SVE-2020 scaffold\_22545, whole genome shotgun sequence  
TGGGTTACATACACGTGCTGTCCTGATGTTCCATACCTGGAT

>CM032236.1:50885104-50885283 *Leptobrachium ailaonicum* isolate 2019-ailao-v1\_NWPU chromosome 3, whole genome shotgun sequence  
TGGGTTTATTATGACTGCTGCCTTGATACGCCTTACCTGGAT

>CM033477.1:122732597-122732776 *Hymenochirus boettgeri* isolate Female2 chromosome 9, whole genome shotgun sequence  
TGGGTGTATTATGACTGCTGCCCGGAAACACCATATCTAGAC

>JAKJIM010035931.1:697-876 *Pipa carvalhoi* isolate CFBHT 2225 *Pipa carvalhoi*\_contig\_35931, whole genome shotgun sequence  
TGGGTTTATTATGATTGTTGTCCTGATACACCATACCTGGAT

>CM030356.1:77401314-77401493 *Xenopus laevis* strain J\_2021 chromosome 9\_10L, whole genome shotgun sequence  
TGGGTTTATTATGACTGCTGCCAGAAACACCATACTTGGAT

>CM004451.2:66280523-66280702 *Xenopus tropicalis* strain Nigerian chromosome 9, whole genome shotgun sequence  
TGGGTTTATTATGACTGTTGCCAGAAACGCCATACTTGGAT

>CM016422.1:54052159-54052338 *Pyxicephalus adspersus* isolate 1538 chromosome 7, whole genome shotgun sequence  
TGGGTTTGTTATTCTTGTTGTCCAGACGTTCCATACCTGGAC

>BLSH010491879.1:618965-619144 *Glandirana rugosa* DNA, scaffold10449653\_len1176436\_cov66\_read141\_ma xK112, whole genome shotgun sequence

TGGGTGGTCTATGACTGCTGCCCTGACACACCATACTTGGAT  
 >LR991685.1:163324039-163324218 *Rana temporaria* genome assembly, chromosome: 6  
 TGGGTCGTCTATGACTGCTGTCCTGACACACCATACTTGGAT  
 >KV992222.1:13352-13531 *Lithobates catesbeianus* isolate Bruno unplaced genomic scaffold  
 Rc-01r160223s0069667, whole genome shotgun sequence  
 TGGGTCGTCTATGACTGCTGTCCTGACACACCATACTTGGAT  
 >VKOB010690764.1:40-219 *Scaphiopus holbrookii* voucher NCSM:84231 6967497, whole  
 genome shotgun sequence  
 TGGGTTTATTATACCTGCTGCCCCGATAAGCCATACCTAGAC  
 >VKNZ010744601.1:18-197 *Spea bombifrons* voucher NCSM:84228 4498154, whole genome  
 shotgun sequence  
 TGGGTTTATTATGACTGCTGTCCAACCAAACCGTACCTGGAC

Chrna1 - alpha-1 positions 180-186  
 >CM030321.1:437425379-437425558 *Ambystoma mexicanum* strain DD151 chromosome  
 9q, whole genome shotgun sequence  
 GATTACCGAGGTTGGAAACAC  
 >CAJPD013104969.1:36-215 *Bombina variegata* genome assembly, contig:  
 contig\_3104969, whole genome shotgun sequence  
 GACAACCGCTGTTGGAAGCAT  
 >LR991673.1:183921276-183921455 *Bufo bufo* genome assembly, chromosome: 7  
 GATTACCGCTGCTGGAAACAC  
 >CM026472.1:34540173-34540352 *Bufo gargarizans* isolate SCDJY-AF-19 chromosome 8,  
 whole genome shotgun sequence  
 GATTACCGCTGCTGGAAACAC  
 >CM034095.1:51234791-51234970 *Eleutherodactylus coqui* isolate HN-11 Male  
 chromosome 10, whole genome shotgun sequence  
 GATTACCGCTGCTGGAAACAT  
 >CM033648.1:76491222-76491401 *Engystomops pustulosus* isolate 237g6f4 chromosome 8,  
 whole genome shotgun sequence  
 GATTACCAATGCTGGAAGCAC  
 >BLSH010491879.1:618965-619144 *Glandirana rugosa* DNA,  
 scaffold10449653\_len1176436\_cov66\_read141\_ma xK112, whole genome shotgun sequence  
 GATTATCAATGCTGGAAGCAT  
 >CM033477.1:122732597-122732776 *Hymenochirus boettgeri* isolate Female2 chromosome  
 9, whole genome shotgun sequence  
 GATTATCGTTGCTGGAAGCAC  
 >CM032236.1:50885104-50885283 *Leptobrachium ailaonicum* isolate 2019-ailao-v1\_NWPU  
 chromosome 3, whole genome shotgun sequence  
 GATTACCGCTGCTGGAAACAC  
 >WWET01001398.1:49535-49714 *Limnodynastes dumerilii* isolate SAMAR66870  
 scaffold001398, whole genome shotgun sequence  
 GATTATCAGTGCTGGAAGCAC  
 >KV992222.1:13352-13531 *Lithobates catesbeianus* isolate Bruno unplaced genomic scaffold  
 Rc-01r160223s0069667, whole genome shotgun sequence  
 GATTATCAATGCTGGAAGCAT  
 >KN905892.1:795302-795481 *Nanorana parkeri* isolate BGI\_ZX\_2015 unplaced genomic

scaffold scaffold44, whole genome shotgun sequence  
GATTATCAGTGCTGGAAGCAT  
>VIAB01000030.1:258890-259069 *Oophaga pumilio* Sca30, whole genome shotgun sequence  
GATTACCGCTGCTGGAAGCAT  
>JAE0BE010700063.1:713-892 *Phrynoglossus myanhessei* voucher SMF 103841 isolate  
Holotype NODE\_4282317\_length\_3454\_cov\_14.630863, whole genome shotgun sequence  
GATTATCAATGTTGGAAGCAT  
>JAKJMM010035931.1:697-876 *Pipa carvalhoi* isolate CFBHT 2225  
*Pipa carvalhoi*\_contig\_35931, whole genome shotgun sequence  
GACTATCGATGCTGGAAACAC  
>JABWIB010022546.1:4978-5157 *Platyplectrum ornatum* isolate SVE-2020 scaffold\_22545,  
whole genome shotgun sequence  
GACTATCGCTGCTGGAAGCAT  
>M0365642\_Pleurodeles\_waltl\_PLEWA04\_M0365642\_PLEWA02\_M0365642\_PLEWA02  
TRINITY\_DN300233\_c9\_g1::TRINITY\_DN300233\_c9\_g1\_i1::g.365642::m.365642  
TRINITY\_DN300233\_c9\_g1::TRINITY\_DN300233\_c9\_g1\_i1::g.365642 ORF type:5prime\_partial  
len:487 (+) TRINITY\_DN300233\_c9\_g1\_i1:1-1461(+) parent\_contig=Trinity\_Pw\_v2  
GATTACCGAGGTTGGAAACAC  
>CM016422.1:54052159-54052338 *Pyxicephalus adspersus* isolate 1538 chromosome 7,  
whole genome shotgun sequence  
GATTATCGCTGTTGGAAACAC  
>LR991685.1:163324039-163324218 *Rana temporaria* genome assembly, chromosome: 6  
GATTATCAATGCTGGAAGCAT  
>ONZH01026881.1:670711-670890 *Rhinella marina* genome assembly, contig:  
ctg3915\_RHIMB\_RM170330.3915, whole genome shotgun sequence  
GATTACCGCTGCTGGAACAT  
>VKOB010690764.1:40-219 *Scaphiopus holbrookii* voucher NCSM:84231 6967497, whole  
genome shotgun sequence  
GACTATCGATGCTGGAAGCAT  
>VKNZ010744601.1:18-197 *Spea bombifrons* voucher NCSM:84228 4498154, whole genome  
shotgun sequence  
GATTATCGATGCTGGAAGCAT  
>CM030356.1:77401314-77401493 *Xenopus laevis* strain J\_2021 chromosome 9\_10L, whole  
genome shotgun sequence  
GATTATCGCTGCTGGAAGCAC  
>CM004451.2:66280523-66280702 *Xenopus tropicalis* strain Nigerian chromosome 9, whole  
genome shotgun sequence  
GATTATCGTGGCTGGAAGCAC  
>Epicrionops sp.\_UMMZ26114  
GATTACCAAGGCTGGAAGCAC  
>Rhinatremas bivittatus\_XM\_029605825.1  
GATTACAAGAGCTGGAAGCAC  
>Caudacaecilia asplenia\_ZRC1.10835  
GATTACCGAGGCTGGAAACAC  
>Ichthyophis kohtaoensis\_  
GATTGCCAAGGCTGGAAACAC

>Ichthyophis garoensis\_BNHS2208  
GATTACCGAGGCTGGAAACAC  
>Ichthyophis sendenyu\_BNHS2209  
GATTACCGAGGCTGGAAACAC  
>Ichthyophis orthoplicatus\_DNMMW1723  
GATTACCGAGGCTGGAAGCAC  
>Ichthyophis glutinosus\_WHT5508  
GATTACCGAGGCTGGAAGCAC  
>Uraeotyphlus cf. malabaricus\_UKMW1711  
GATTACCGAGGCTGGAAACAC  
>Uraeotyphlus cf. oxyurus\_UK MW212  
GATTGCAGAGGCTGGAAACAC  
>Scolecomorphus uluguruensis\_BMNH2002.099  
GATTACCGAGGCTGGAAGCAT  
>Scolecomorphus vittatus\_CAS168810  
GATTACAGAGGCTGGAAGCAT  
>Herpele squalostoma\_BMNH2000.096  
GATTACCGAGGCTGGAAGCAT  
>Boulengerula boulengeri\_RAN31530  
GATTACCGAAGCTGGAAGCAT  
>Chthonerpeton indistinctum\_MCPMW15  
GATTACCGATGCTGGAAGCAT  
>Typhlonectes compressicauda\_UMFS11776  
GATTACCGAGGCTGGAAGCAT  
>Typhlonectes natans\_BMNH2000.218.  
GATTACCGAGGCTGGAAGCAT  
>Potomotyphlus kaupii\_UMFS11777  
GATTACMGAGGCTGGAAGCAT  
>Caecilia abitaguae\_MZUTI4030  
GATTACCGAGGCTGGAAGCAT  
>Caecilia guntheri\_MZUTI3039  
GATTACCGAGGCTGGAAGCAT  
>Caecilia orientalis\_MZUTI1371  
GATTACCGAGGCTGGAAGCAT  
>Caecilia tentaculata\_MZUTI3919  
GATTACCGAGGCTGGAAGCAT  
>Gegeneophis ramaswamii\_UKMW331  
GATTACCGAGGCTGGAAGCAT  
>Hypogeophis rostratus\_RAN31441  
GATTACCGAGGCTGGAAGCAT  
>Praslinia cooperi\_RAN31305  
GATTACCGAGGCTGGAAGCAT  
>Hypogeophis alternans\_RAN 31465  
GATTACCGAGGCTGGAAGCAT  
>Luetkenotyphlus brasiliensis\_BMNH2005.3  
GATTACCGAGGCTGGAAGCAT  
>Microcaecilia sp.\_NHMMW995

GATTACCGAGGCTGGAAGCAT  
 >Microcaecilia unicolor\_XM\_030209957.1  
 GATTACCGAGGCTGGAAGCAT  
 >Siphonops annulatus\_RAN31968  
 GATTACCGAGGCTGGAAGCAT  
 >Siphonops paulensis\_CHUNB39114  
 GATTACCGAGGCTGGAAGCAT  
 >Schistometopum thomense\_RAN31503  
 GATTACCGAGGCTGGAGGCAT  
 >Geotrypetes seraphini\_XM\_033946945.1  
 GATTACCGAGGCTGGAAGCAT  
 >Dermophis mexicanus\_RAN31534  
 GATTACCGAGGCTGGAAGCAT  
 >Gymnopsis syntrema\_RAN31499  
 GATTACCGAGGCTGGAAGCAT  
 >Chikila alcocki\_BNHS2210  
 GATTTCAGGGCTGGCCGCAT  
 >Chikila gaiduwani\_BNHS2211  
 GATTTCAGGGCTGGCCGCAT  
 >Hypogeophis pti\_SM295  
 -----  
 >Hypogeophis brevis\_SM691  
 -----  
 >Hypogeophis larvatus\_SM297  
 -----

Chrna1 - alpha-1 positions 201-207  
 >CM030321.1:437425379-437425558 Ambystoma mexicanum strain DD151 chromosome  
 9q, whole genome shotgun sequence  
 ATTACATATCATTTCTCATG  
 >CAJPD013104969.1:36-215 Bombina variegata variegata genome assembly, contig:  
 contig\_3104969, whole genome shotgun sequence  
 ATCACATATCACTTCCTTATG  
 >LR991673.1:183921276-183921455 Bufo bufo genome assembly, chromosome: 7  
 GTCACCTACCACTTCGTCCTA  
 >CM026472.1:34540173-34540352 Bufo gargarizans isolate SCDJY-AF-19 chromosome 8,  
 whole genome shotgun sequence  
 GTCACCTACCACTTCGTCCTA  
 >CM034095.1:51234791-51234970 Eleutherodactylus coqui isolate HN-11 Male  
 chromosome 10, whole genome shotgun sequence  
 ATCACCTACCACTTCGTCCTA  
 >CM033648.1:76491222-76491401 Engystomops pustulosus isolate 237g6f4 chromosome 8,  
 whole genome shotgun sequence  
 ATCACCTACCATTTCTTCTG  
 >BLSH010491879.1:618965-619144 Glandirana rugosa DNA,  
 scaffold10449653\_len1176436\_cov66\_read141\_ma xK112, whole genome shotgun sequence  
 ATCACCTATCATTTCTTATG

>CM033477.1:122732597-122732776 *Hymenochirus boettgeri* isolate Female2 chromosome 9, whole genome shotgun sequence  
ATCACATACCATTCCTCTTG

>CM032236.1:50885104-50885283 *Leptobrachium ailaonicum* isolate 2019-ailao-v1\_NWPU chromosome 3, whole genome shotgun sequence  
ATCACCTACCACTTCCTCTTG

>WWET01001398.1:49535-49714 *Limnodynastes dumerilii* isolate SAMAR66870 scaffold001398, whole genome shotgun sequence  
ATCACCTTCATTCCTCCTG

>KV992222.1:13352-13531 *Lithobates catesbeianus* isolate Bruno unplaced genomic scaffold Rc-01r160223s0069667, whole genome shotgun sequence  
ATCACCTATCATTCCTCATG

>KN905892.1:795302-795481 *Nanorana parkeri* isolate BGI\_ZX\_2015 unplaced genomic scaffold scaffold44, whole genome shotgun sequence  
ATCACCTATCATTCCTCATG

>VIAB01000030.1:258890-259069 *Oophaga pumilio* Sca30, whole genome shotgun sequence  
ATCACCTACCATTCGTCTTA

>JAE0BE010700063.1:713-892 *Phrynoglossus myanhessei* voucher SMF 103841 isolate Holotype NODE\_4282317\_length\_3454\_cov\_14.630863, whole genome shotgun sequence  
ATCACCTATCATTCCTGATG

>JAKJ010035931.1:697-876 *Pipa carvalhoi* isolate CFBHT 2225 *Pipa carvalhoi*\_contig\_35931, whole genome shotgun sequence  
ATCACTTACCACTTTCTCTTA

>JABWIB010022546.1:4978-5157 *Platyplectrum ornatum* isolate SVE-2020 scaffold\_22545, whole genome shotgun sequence  
ATCACCTATCACTTCGTCTTG

>M0365642\_Pleurodeles\_waltl\_PLEWA04\_M0365642\_PLEWA02\_M0365642\_PLEWA02 TRINITY\_DN300233\_c9\_g1::TRINITY\_DN300233\_c9\_g1\_i1::g.365642::m.365642 TRINITY\_DN300233\_c9\_g1::TRINITY\_DN300233\_c9\_g1\_i1::g.365642 ORF type:5prime\_partial len:487 (+) TRINITY\_DN300233\_c9\_g1\_i1:1-1461(+) parent\_contig=Trinity\_Pw\_v2  
ATCACATATCATTCCTCATG

>CM016422.1:54052159-54052338 *Pyxicephalus adspersus* isolate 1538 chromosome 7, whole genome shotgun sequence  
ATAACCTATCACTTCATACTG

>LR991685.1:163324039-163324218 *Rana temporaria* genome assembly, chromosome: 6  
ATCACCTATCATTCCTCATG

>ONZH01026881.1:670711-670890 *Rhinella marina* genome assembly, contig: ctg3915\_RHIMB\_RM170330.3915, whole genome shotgun sequence  
ATCACCTACCACTTCGTCCTA

>VKOB010690764.1:40-219 *Scaphiopus holbrookii* voucher NCSM:84231 6967497, whole genome shotgun sequence  
ATCACCTACCACTTTATCCTA

>VKNZ010744601.1:18-197 *Spea bombifrons* voucher NCSM:84228 4498154, whole genome shotgun sequence  
ATCACCTACCACTTTGTGCTG

>CM030356.1:77401314-77401493 *Xenopus laevis* strain J\_2021 chromosome 9\_10L, whole



genome shotgun sequence

ATCACATAACCATTTTCTCCTG

>CM004451.2:66280523-66280702 *Xenopus tropicalis* strain Nigerian chromosome 9, whole

genome shotgun sequence

ATCACATAACCATTTTCTCCTG

>*Epicrionops* sp.\_UMMZ\_RAN26114

ATCACTTACCATTTCCTGATG

>*Rhinatrema bivittatum*\_XM\_029605825.1

ATCACTTACCATTTCCTGTTG

>*Caudacaecilia asplenia*\_ZRC1.10835

ATCACCTACCATTTCGTAATG

>*Ichthyophis kohtaoensis*\_

ATCACCTACCATTTCCTAATG

>*Ichthyophis garoensis*\_BNHS2208

ATCACCTACCATTTC-----

>*Ichthyophis sendenyu*\_BNHS2209

ATCACCTACCATTTC-----

>*Ichthyophis orthoplicatus*\_DNMMW1723

ATCACCTACCATTTCCTGATG

>*Ichthyophis glutinosus*\_WHT5508

ATCACCTACCATTTCCTGATG

>*Uraeotyphlus* cf. *malabaricus*\_UKMW1711

ATCACTTACCATTTC-TGATG

>*Uraeotyphlus* cf. *oxyurus*\_UK MW212

ATCACCTACCATTTCGTGATG

>*Uraeotyphlus* cf. *malabaricus*\_UKMW1711

ATCACTTACCATTTC-TGATG

>*Scolecormorphus uluguruensis*\_BMNH2002.099

ATCACCTACCATTTCCTGATG

>*Scolecormorphus vittatus*\_CAS168810

ATCACCTACCATTCCCTGATG

>*Herpele squalostoma*\_BMNH2000.096

ATCACATAACCACTTCCTGATG

>*Boulengerula boulengeri*\_RAN31530

ATCACGTACCATTTCCTGATG

>*Chthonerpeton indistinctum*\_MCPMW15

ATCACTTACCATTTCCTGATG

>*Typhlonectes compressicauda*\_UMFS11776

ATCACTTACCATTTCCTGATG

>*Typhlonectes natans*\_BMNH2000.218.

ATCACTTACCATTTCCTGATG

>*Potomotyphlus kaupii*\_UMFS11777

ATCACTTACCATTTCCTGATG

>*Caecilia abitaguae*\_MZUTI4030

ATCACTTATCACTTCCTGATG

>*Caecilia guntheri*\_MZUTI3039

ATCACTTATCACTTCCTGTTG

>Caecilia orientalis\_MZUTI1371  
 ATCACTTATCACTTCCTGATG  
 >Caecilia tentaculata\_MZUTI3919  
 ATCACTTATCACTTGCTGTTG  
 >Gegeneophis ramaswamii\_UKMW331  
 ATCACTTATCACTTCGTGCTG  
 >Hypogeophis rostratus\_RAN31441  
 ATCACTTATCACTTCCTGATG  
 >Praslinia cooperi\_RAN31305  
 ATCACTTATCACTTCCTGATG  
 >Hypogeophis alternans\_RAN 31465  
 ATCACTTATCACTTCCTGATG  
 >Luetkenotyphlus brasiliensis\_BMNH2005.3  
 ATCACTTATCACTTCCTGATG  
 >Microcaecilia sp.\_NHMMW995  
 ATCACTTATCACTTCCTGATG  
 >Microcaecilia unicolor\_XM\_030209957.1  
 ATCACTTATCACTTCCTGATG  
 >Siphonops annulatus\_RAN31968  
 ATCACTTATCACTTCCTGATG  
 >Siphonops paulensis\_CHUNB39114  
 ATCACTTATCACTTCCTGATG  
 >Schistometopum thomense\_RAN31503  
 ATCACTTATCACTTCCTGATG  
 >Geotrypetes seraphini\_XM\_033946945.1  
 ATCACGTATCACTTCCTGATG  
 >Dermophis mexicanus\_RAN31534  
 ATCACTTATCACTTCCTGATG  
 >Gymnopsis syntrema\_RAN31499  
 ATCACTTATCACTTCCTGATG  
 >Chikila alcocki\_BNHS2210  
 ATCACCTACCACTT-----  
 >Chikila gaiduwani\_BNHS2211  
 ATCACCTACCACTT-----  
 >Hypogeophis pti\_SM295  
 ATCACTTATCACTTCC-----  
 >Hypogeophis brevis\_SM691  
 ATCACTTATCACTTCC-----  
 >Hypogeophis larvatus\_SM297  
 ATCACTTATCACTTCC-----

## Chrna2

>Pleurodeles waltl\_  
 ACCAAGAAGTATGACTGCTGCACGGAGATCTACCCGGACATC  
 >Ambystoma mexicanum\_SuperContig\_183730  
 ACCAAGAAGTACGACTGCTGCACTGAGATCTACCCTGATATC  
 >Bufo bufo\_XM\_040427115.1

ACTAAAAAGTATGATTGCTGCACTGAGATTTACCCTGACATC  
>Nanorana\_parkeri\_XM\_018570301.1  
TCTAAGAAATATGATTGCTGCACGGAAATTTACCCTGATATT  
>Xenopus\_tropicalis\_XM\_004914941.4  
TCCAAGAAATACGACTGTTGCACGGAAATCTATCCAGATATC  
>Rhinatrema\_bivittatum\_XM\_029596210.1  
ACTAAAAAGTATGACTGCTGCACTGAAATCTACCCAGACATC  
>Microcaecilia\_unicolor\_XM\_030195550.1  
ACTAAAAAGTATGATTGCTGCACTGAAATCTACCCAGACATC  
>Geotrypetes\_seraphini\_XM\_033939894.1  
ACCAAAAAGTATGATTGCTGCACTGAAATCTACCCTGACATC

#### Chrna4

>Pleurodeles\_waltl\_  
ATCAAGAAGTATGAGTGCTGTACTGAGATATACCCTGACATC  
>Ambystoma\_mexicanum\_SuperContig\_16675  
ACCAAAAAGTATGATTGCTGCACTGAAATCTACCCTGACATC  
>Bufo\_bufo\_XM\_040435648.1  
ATCAAAAAGTATGAGTGCTGCACAGAAATATACTCAGACATC  
>Nanorana\_parkeri\_XM\_018560101.1  
ATCAAAAAGTACGAGTGCTGCACGGAGATCTACTCGGACATC  
>Xenopus\_tropicalis\_NM\_001113843.1  
ATCAAGAAATATGAGTGTTGCACGGAGATTTATTCCGACATC  
>Rhinatrema\_bivittatum\_XM\_029613401.1  
ACAAAGAAATACGAGTGCTGCACGGAAATCTACCCCGACATC  
>Microcaecilia\_unicolor\_XM\_030212004.1  
ATTAAGAAATACGAGTGTTGTACTGAAATTTACCCTGATATT  
>Geotrypetes\_seraphini\_XM\_033939894.1  
ATTAAGAAATATGAGTGCTGCACTGAAATCTACCCTGATATT
