# Supplementary material for: Resistance Is Not Futile: Widespread Convergent Evolution of Resistance to Alpha-Neurotoxic Snake Venoms in Caecilians (Amphibia: Gymnophiona)
Source: MDPI journal article supplement (doi:10.3390/ijms241411353), 2023-07-12
Supplement: s1 [file s1]

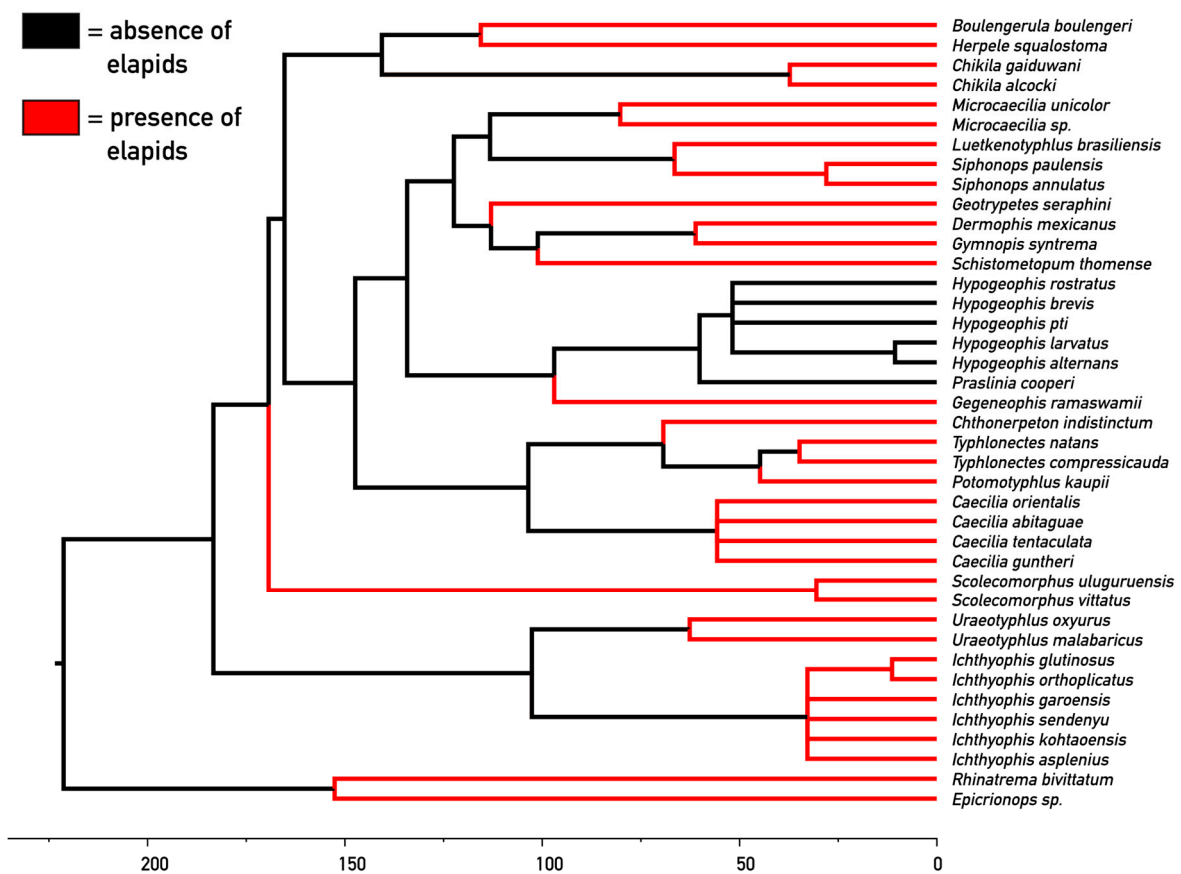

Supplementary Figure S1. showing branches evolving under presence or absence of elapid snakes.

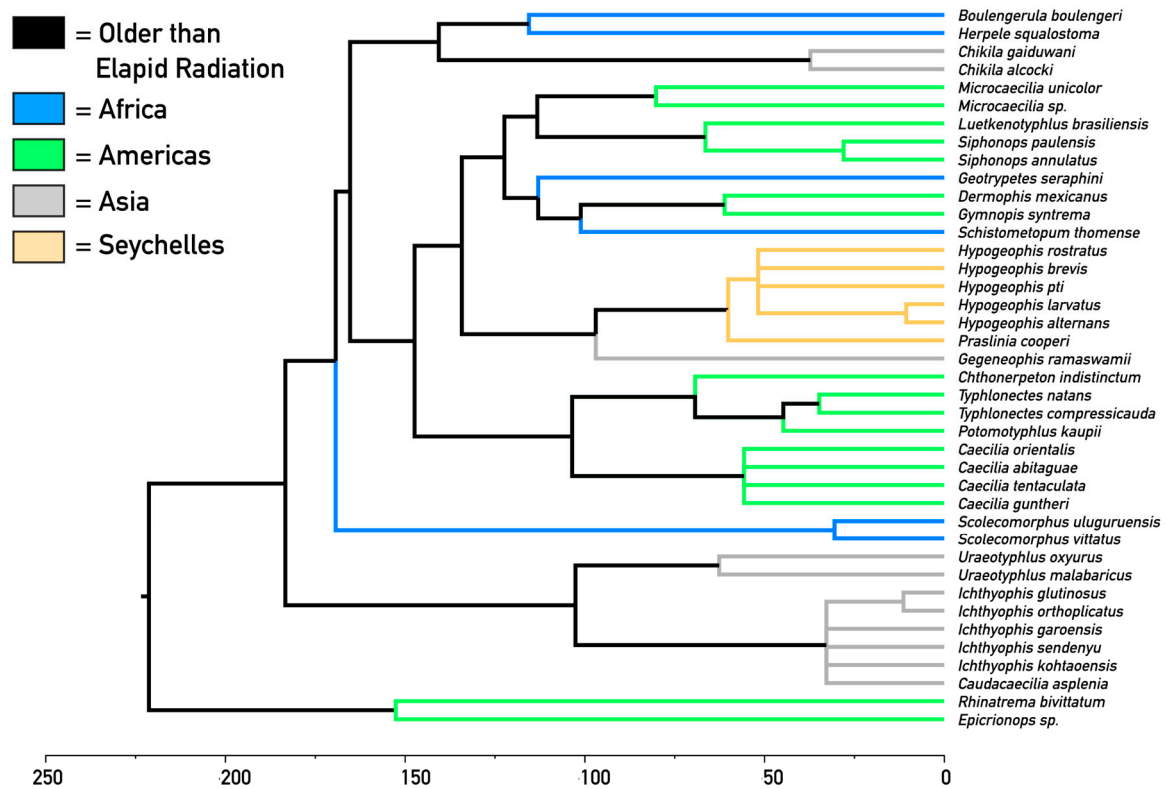

Supplementary Figure S2. showing branches divided by geographical location.
